# Supplementary material
Source: MDPI journal article supplement (https://www.mdpi.com/1999-4907/14/11/2225)
Supplement: s1 [file s1]

## ***Supplementary Materials***

### **S1 — Genotyping procedure and cpDNA haplotypes**

The DNA was extracted from silica-dried cambium samples using a commercial Qiagen DNeasy 96 Plant Kit (Qiagen, Qiagen, Hilden, Germany) according to the manufacturer's instructions. The quality of DNA was assessed by NanoDrop Spectrophotometer ND-1000 (Thermo Scientific) and gel electrophoresis with 1.00% (w/v) agarose. The samples were diluted to 3–10ng/μl concentration before PCR. For genotyping, ten plastid primer pairs selected from Deguilloux et al. (2003) and Weising & Gardner (1999) were analyzed to estimate the autochthony and eight nuSSRs primer pairs described by Steinkellner et al. (1997) and Kampfer et al. (1998) to describe patterns of genetic structure and diversity. These were amplified by PCR in multiplex reactions (Table S1) with the QIAGEN Type-it Microsatellite PCR Kit (Qiagen, Hilden, Germany) in a standard reaction mixture of 10 μl. The mixture contained standardly 5μl of 2x Type-it Multiplex PCR Master Mix (Qiagen), 3μl of RNase-free water (Qiagen), 1μl of the primer mix, and 1μl of 3–10ng template DNA.

#### **Nuclear SSRs**

The standard PCR program (for all multiplexes) consisted of the following steps: initial denaturation at 95°C for 15 min, min 30 cycles with denaturation at 94°C for 30 sec, followed by primer annealing at 56°C for 90 sec, and then extension at 72°C for 30 sec, ending with a final extension step at 60°C for 30 min. Primer sequences, fluorescent dyes used, and multiplex combinations are presented in Table S1.

The concentration of the amplified fragments after PCR was estimated by electrophoresis on a 1.5 % agarose gel. The PCR products of each reaction were diluted in HPLC water based on the observed concentration on the agarose gel. We subsequently carried out capillary electrophoresis using a CEQ 8000 Genetic Analysis System (Beckman Coulter, Inc. CA) and the internal 400bp Size Standard (Analisis, Netherlands). The sizing of fragments was performed using the software GeneMapper v5.0 (Applied Biosystems).

#### **cpSSRs**

The cpSSRs were all combined into one multiplex. PCR was carried out in a GeneAmp® PCR-system 9700 thermocycler (Applied Biosystems) using following program consisting of following steps: initial denaturation at 96°C for 1 min and 35 cycles with denaturation at 96°C for 10 s, primer annealing at 50°C for 5 s and extension at 72°C for 1 min. Prior to capillary electrophoresis, the PCR reactions were purified applying gel filtration with use of Sephadex G-50. CpSSRs genotypes were resolved on an ABI PRISM™ 3100 DNA Genetic Analyzer (Applied Biosystems. Inc., Foster City, California, USA). The sizing of fragments was carried out with a GeneMarker v 1.8 (Applied Biosystems), utilizing the internal GENESCAN™-500 ROX™ Size Standard (Applied Biosystems).

**Table S1.** Summary of genotype loci including locus name, type, primer sequences, fluorescent dyes, multiplex combinations (including concentration in the multiplex of each primer), measured fragment sizes, and sources of primers.

| Locus           | Marker | Forward                  | Reverse                   | Fluorescent Dye   | Multiplex     | Reference                  |
|-----------------|--------|--------------------------|---------------------------|-------------------|---------------|----------------------------|
| <b>QpZAG15</b>  | nSSR   | CGATTTGATAATGACACTATGG   | CATCGACTCATTGTAAGCAC      | Cyanine 5 (blue)  | Mix1 (0.2 µM) | Steinkellner et al. (1997) |
| <b>QpZAG104</b> | nSSR   | ATAGGGAGTGAGGACTGAATG    | GATGGTACAGTAGCAACATTC     | IRD700 (green)    | Mix1 (0.4 µM) | Steinkellner et al. (1997) |
| <b>QpZAG110</b> | nSSR   | GGAGGCTTCCTCAACCTACT     | GATCTCTTGTTGCTGTATTT      | Cyanine 5 (blue)  | Mix2 (0.6 µM) | Steinkellner et al. (1997) |
| <b>QrZAG7</b>   | nSSR   | CAACTTGGTGTTCCGATCAA     | GTGCATTTCTTTTATAGCATTCAC  | DY-751 (yellow)   | Mix2 (0.6 µM) | Kampfer et al. (1998)      |
| <b>QrZAG65</b>  | nSSR   | CAGTGGTGTCAACTCCTCCCAG   | GTCAGGTGACCATTCAAACCTAGAA | Cyanine 5 (blue)  | Mix3 (0.6 µM) | Kampfer et al. (1998)      |
| <b>QrZAG87</b>  | nSSR   | TCCCACCACTTTGGTCTCTCA    | GTTGTCAGCAGTGGGATGGGTA    | Cyanine 5 (blue)  | Mix3 (0.1 µM) | Kampfer et al. (1998)      |
| <b>QrZAG5b</b>  | nSSR   | TGAAGAGTAAGACCATTACATCA  | GTATGTGAGTGTTTGTGGTTTGG   | IRD700 (green)    | Mix3 (0.8 µM) | Kampfer et al. (1998)      |
| <b>QrZAG20</b>  | nSSR   | CCATTAAAAGAAGCAGTATTTTGT | GCAACACTCAGCCTATATCTAGAA  | DY-751 (yellow)   | Mix3 (0.6 µM) | Kampfer et al. (1998)      |
| <b>µdt1</b>     | cpSSR  | ATCTTACACTAAGCTCGGA      | TTCAATAACTTGTTGATCCC      | 6-Fam (blue)      | Mix4 (0.3 µM) | Deguilloux et al. (2003)   |
| <b>ccmp6</b>    | cpSSR  | CGATGCATATGTAGAAAAGCC    | CATTACGTGCGACTATCTCC      | 6-Fam (blue)      | Mix4 (0.8 µM) | Weising und Gardner (1999) |
| <b>µkk4</b>     | cpSSR  | TTGTTTACCTATAATTGGAGC    | TAGCGGATCGGTTCAAACTT      | 6-Fam (blue)      | Mix4 (0.8 µM) | Deguilloux et al. (2003)   |
| <b>µdt4</b>     | cpSSR  | GATAATATAAAGAGTCAAAT     | CCGAAAGGTCCTATACCTCG      | 6-Fam (blue)      | Mix4 (4.0 µM) | Deguilloux et al. (2003)   |
| <b>µcd5</b>     | cpSSR  | CCCCCGGATCTCTGTCAACTG    | TAATAAACGAGAATCACATAA     | HEX (green)       | Mix4 (0.5 µM) | Deguilloux et al. (2003)   |
| <b>µkk3</b>     | cpSSR  | TTAGATCGGGTAATCGTTCAA    | AAGTGAATAAATGGATAGAGC     | HEX (green)       | Mix4 (0.4 µM) | Deguilloux et al. (2003)   |
| <b>ccmp2</b>    | cpSSR  | GATCCCGGACGTAATCCTG      | ATCGTACCGAGGGGTTTCAAT     | HEX (green)       | Mix4 (0.5 µM) | Weising und Gardner (1999) |
| <b>µcd4</b>     | cpSSR  | TTATTTGTTTTTGGTTTCACC    | TTTCCCATAGAGAGTCTGTAT     | Atto 550 (yellow) | Mix4 (0.8 µM) | Deguilloux et al. (2003)   |
| <b>ccmp10</b>   | cpSSR  | TTTTTTTTTAGTGAACGTGTCA   | TTCGTCGDCGTAGTAAATAG      | Atto 550 (yellow) | Mix4 (0.8 µM) | Weising und Gardner (1999) |
| <b>µdt3</b>     | cpSSR  | TGTTAGTAATCCTTTCGTTT     | AGGTATAAAGTCTAAGGTAA      | Atto 550 (yellow) | Mix4 (0.8 µM) | Deguilloux et al. (2003)   |

All forward primers were labelled with a fluorescent dye.

## **S2 — Selection and characterization of three drought events**

Drought events were determined based on the Standardized Precipitation Evapotranspiration Index (SPEI; Vicente-Serrano et al. 2010), using the R package SPEI (Beguería et al. 2014). As input data, homogenized weather station data from the Geosphere Austria meteorological station Retz (Lat: 48.754, Lon: 15.950) was used. (<https://www.zamg.ac.at/histalp>). This weather station, which is located approximately 10-20km from the studied oak populations, covered monthly data for precipitation and mean temperature from 1895 to 2020 (see Figure S1b). Potential evapotranspiration (PET) was calculated using mean temperature and latitude by applying the Thornthwaite-Function (R-package SPEI). SPEI was calculated using a 6-month time period.

The event's lowest SPEI value was seen in 2006 (-2.69). Due to an overlap with the event of 2000, it was decided to use the period 1992–1994 as the first drought event. 1992 marked the first year with a mean annual temperature higher than 10°C, followed by another record-breaking year, 1994 (10.5°C), while the whole period showed below-average precipitation levels. The event 1992–1994 had an average SPEI of -0.91 and an average yearly minimum SPEI of -1.95, minimum SPEI of -1.95, followed by a period 1995–1997 with an average SPEI of 0.22. 1987 serves as wet year control (619mm annual rainfall compared to an average of 483mm for 1980–1990) with average conditions before (1984–1986: 519mm) and afterward (1988–1991: 452mm). In addition to the drought event (1992–1994), two additional historical drought events (1917, 1947) were selected similarly. The year 1917 represents the year with the least precipitation sum of collected time series (1895–2020), showing an average SPEI of -1.24 and minimum SPEI of -2.11. 1947 was a year with low precipitation, occurring after a longer season (1935–1945) with good precipitation conditions during the growing season (May–September). The average SPEI for 1947 was -0.18 and minimum SPEI was -1.63.

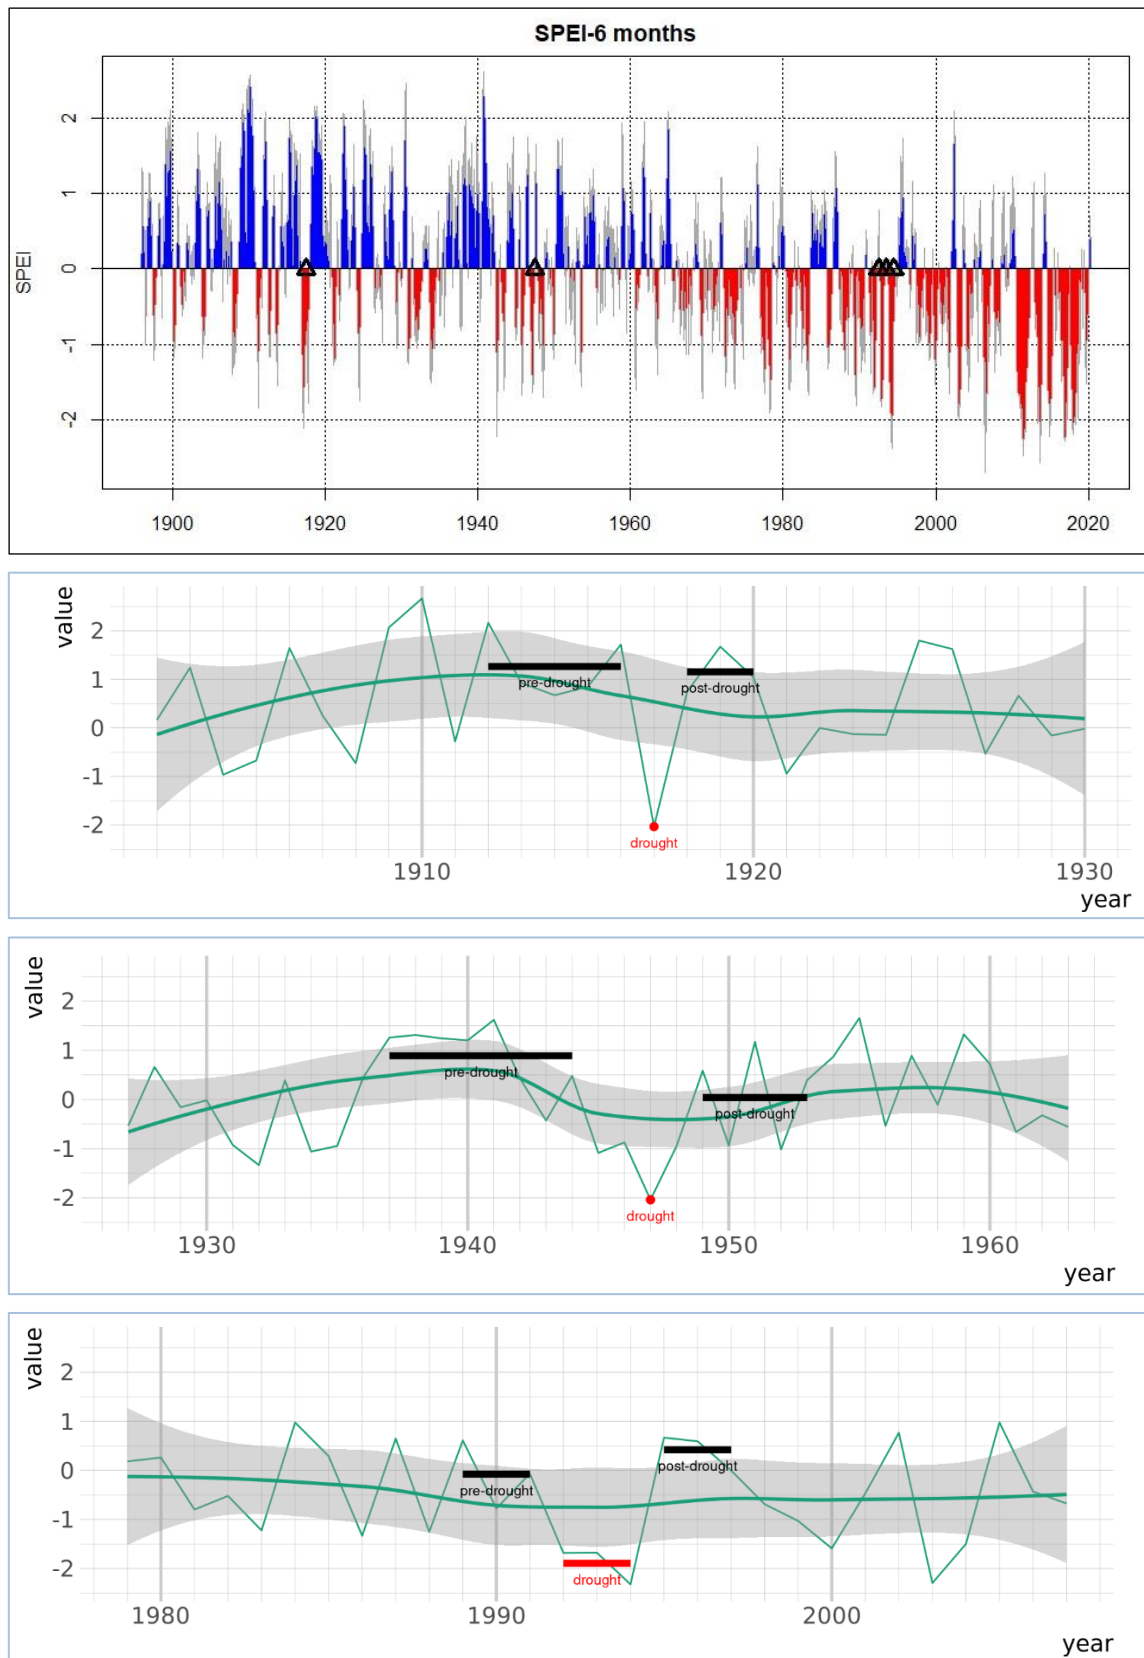

**Figure S1a.** Selected drought years and the SPEI time series. This figure displays the monthly SPEI (6-month aggregation length) for weather station Retz, highlighting the selected drought events (1917, 1947, 1992-1994) with triangular markers. In addition, the selected drought years with their pre-drought

and post-drought periods are shown. The X-axis denotes the years, and the Y-axis the annual vegetation period SPEI values (6<sup>th</sup> month ending in September).

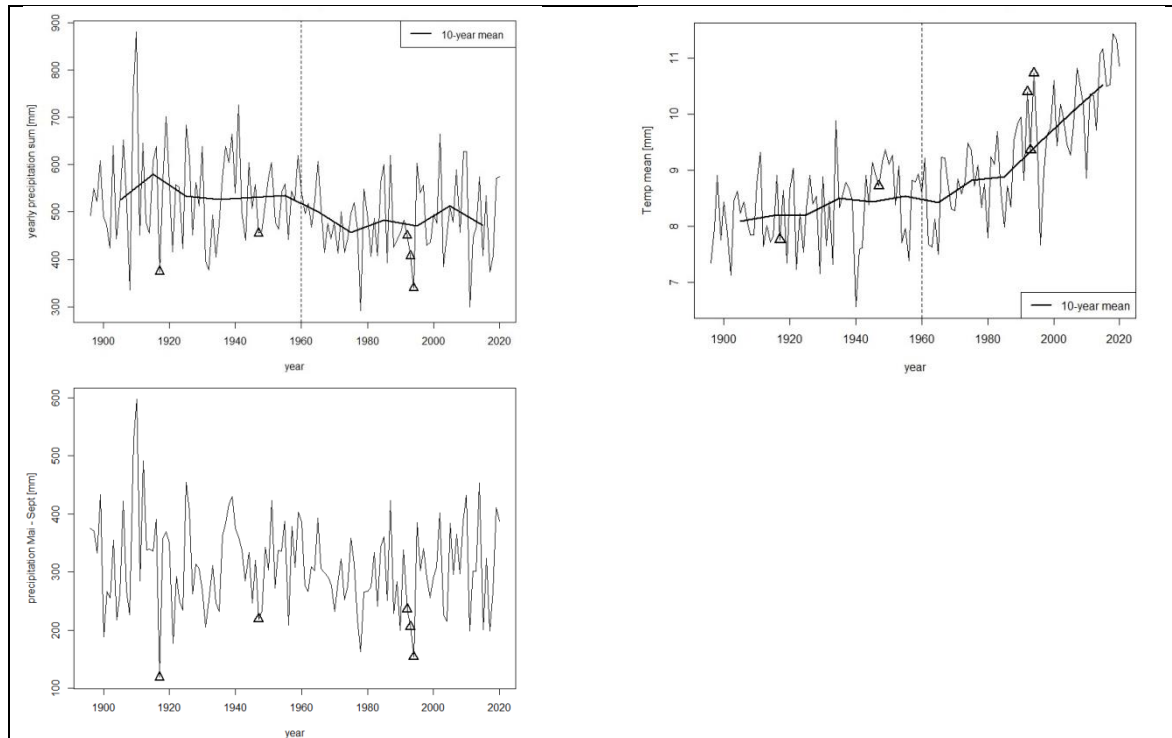

**Figure S1b.** Trends in mean annual precipitation, mean seasonal precipitation, and mean temperature estimated for the period 1900–2020 derived from the climatic data measured at station Retz. The triangles depict the years used for analysis of drought tolerance (1917, 1947, 1992, 1993, 1994).

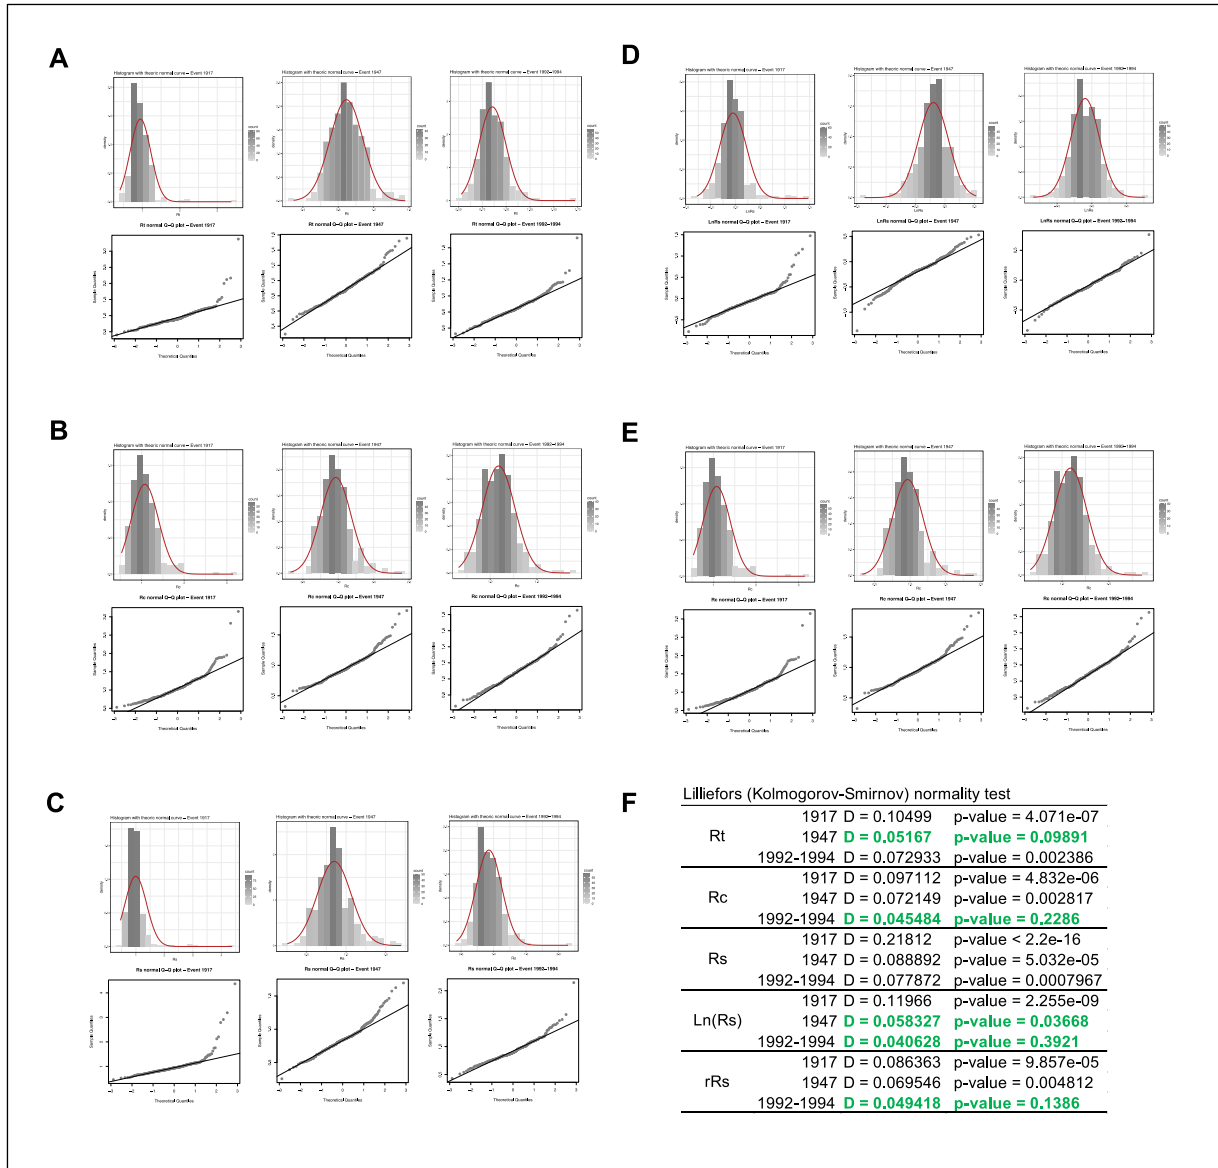

**Figure S2.** Histogram with normal distribution curve (red line) and Q-Q plot for all traits on all studied drought events A) Resistance. B) Recovery. C) Resilience. D) Natural logarithm of resilience. E) Relative resilience. F) Lilliefors test results for all traits and drought events, green highlighted those that significantly ( $p\text{-value} \geq 0.01$ ) fit a normal distribution.

### S3 — Population characterization specific measures of genetic variation

**Table S2.** Reference samples with different haplotypes revealed by PCR-RFLP analysis (Petit et al. 2002 and Tutková-van Loo & Burg 2004).

| Sample | Locality              | Species            | Longitude | Latitude | Altitude | Country | Haplotype |
|--------|-----------------------|--------------------|-----------|----------|----------|---------|-----------|
| A005   | Klein Meiseldorf      | <i>Q. robur</i>    | 15.828    | 48.676   | 330      | Austria | 17a       |
| A007   | Losenstein            | <i>Q. robur</i>    | 14.464    | 47.935   | 400      | Austria | 7         |
| A015   | Hartberg              | <i>Q. petraea</i>  | 16.090    | 47.673   | 490      | Austria | 5         |
| A018   | Altenburg             | <i>Q. r x Q. p</i> | 15.575    | 48.637   | 425      | Austria | 17a       |
| A023   | Altenburg             | <i>Q. petraea</i>  | 15.585    | 48.624   | 360      | Austria | 17a       |
| A026   | Altenburg             | <i>Q. petraea</i>  | 15.585    | 48.624   | 360      | Austria | 17a       |
| A029   | Schönbühel a.d. Donau | <i>Q. petraea</i>  | 15.362    | 48.273   | 315      | Austria | 2         |
| A033   | Karlstetten           | <i>Q. petraea</i>  | 15.533    | 48.290   | 350      | Austria | 2         |
| A038   | Weyersdorf            | <i>Q. petraea</i>  | 15.514    | 48.283   | 435      | Austria | 2         |
| A043   | Krems                 | <i>Q. petraea</i>  | 15.493    | 48.556   | 400      | Austria | 17a       |
| A045   | Krems                 | <i>Q. robur</i>    | 15.493    | 48.556   | 400      | Austria | 17a       |
| A047   | Krems                 | <i>Q. robur</i>    | 15.493    | 48.556   | 400      | Austria | 17a       |
| A053   | Etzmannsdorf          | <i>Q. petraea</i>  | 15.642    | 48.615   | 395      | Austria | 2         |
| A065   | Waidhofen a.d. Ybbs   | <i>Q. robur</i>    | 14.649    | 48.060   | 295      | Austria | 7         |
| A071   | Seitenstetten         | <i>Q. robur</i>    | 14.795    | 47.970   | 340-360  | Austria | 7         |
| A092   | Karlsberg             | <i>Q. robur</i>    | 14.328    | 46.716   | 650-690  | Austria | 7         |
| A123   | Trieben               | <i>Q. petraea</i>  | 14.871    | 46.636   | 500-700  | Austria | 5         |
| A144   | Finkenstein, Ruine    | <i>Q. petraea</i>  | 13.904    | 46.540   | 780-820  | Austria | 7         |
| A166   | Weissenstein          | <i>Q. robur</i>    | 13.704    | 46.689   | 550-570  | Austria | 7         |
| A188   | Geschriebenstein      | <i>Q. petraea</i>  | 16.425    | 47.381   | 700      | Austria | 2         |
| A236   | Breitenstein          | <i>Q. petraea</i>  | 15.878    | 47.670   | 680      | Austria | 5         |
| A241   | Payerbach             | <i>Q. petraea</i>  | 15.898    | 47.685   | 570      | Austria | 5         |
| A246   | Gleibsfeld            | <i>Q. petraea</i>  | 16.148    | 47.680   | 380      | Austria | 5         |
| A250   | Gleibsfeld            | <i>Q. petraea</i>  | 16.148    | 47.680   | 380      | Austria | 5         |
| A251   | Warth                 | <i>Q. petraea</i>  | 16.144    | 47.656   | 410      | Austria | 5         |
| A256   | Hafning               | <i>Q. petraea</i>  | 16.108    | 47.688   | 500      | Austria | 5         |
| A260   | Hafning               | <i>Q. r x Q. p</i> | 16.108    | 47.688   | 500      | Austria | 5         |
| A261   | Schrattenbach         | <i>Q. petraea</i>  | 16.003    | 47.786   | 560      | Austria | 5         |
| A327   | Altenmarkt            | <i>Q. robur</i>    | 14.644    | 47.720   | 500      | Austria | 7         |
| A330   | Altenmarkt            | <i>Q. robur</i>    | 14.644    | 47.720   | 500      | Austria | 7         |
| A339   | Galgenbühel           | <i>Q. robur</i>    | 14.813    | 47.186   | 730      | Austria | 1         |
| A343   | Lamprechtshausen      | <i>Q. robur</i>    | 12.939    | 47.959   | 425      | Austria | 1         |
| A344   | Lamprechtshausen      | <i>Q. robur</i>    | 12.939    | 47.959   | 425      | Austria | 1         |
| A371   | Proleb, S-Hang        | <i>Q. robur</i>    | 15.115    | 47.394   | 750      | Austria | 7         |
| A374   | Stoitzendorf          | <i>Q. petraea</i>  | 15.861    | 48.656   | 310-320  | Austria | 5         |
| A375   | Stoitzendorf          | <i>Q. petraea</i>  | 15.861    | 48.656   | 310-320  | Austria | 6         |
| A378   | Stoitzendorf          | <i>Q. robur</i>    | 15.861    | 48.656   | 310-320  | Austria | 6         |

|             |                   |                   |        |        |         |         |     |
|-------------|-------------------|-------------------|--------|--------|---------|---------|-----|
| <b>A379</b> | Stoitzendorf      | <i>Q. robur</i>   | 15.861 | 48.656 | 310-320 | Austria | 6   |
| <b>A380</b> | Stoitzendorf      | <i>Q. petraea</i> | 15.861 | 48.656 | 310-320 | Austria | 6   |
| <b>A381</b> | Stoitzendorf      | <i>Q. petraea</i> | 15.861 | 48.656 | 310-320 | Austria | 6   |
| <b>A382</b> | Stoitzendorf      | <i>Q. robur</i>   | 15.861 | 48.656 | 310-320 | Austria | 6   |
| <b>A385</b> | Hochstraß         | <i>Q. robur</i>   | 13.653 | 48.421 | 570     | Austria | 1   |
| <b>A386</b> | Hochstraß         | <i>Q. robur</i>   | 13.653 | 48.421 | 570     | Austria | 1   |
| <b>A387</b> | Hochstraß         | <i>Q. robur</i>   | 13.653 | 48.421 | 570     | Austria | 1   |
| <b>A390</b> | Kritzling         | <i>Q. robur</i>   | 13.518 | 48.546 | 430     | Austria | 7   |
| <b>A394</b> | Dötzledt          | <i>Q. robur</i>   | 13.728 | 48.285 | 440     | Austria | 1   |
| <b>A395</b> | Wendling          | <i>Q. robur</i>   | 13.636 | 48.196 | 410     | Austria | 1   |
| <b>A396</b> | Poppreith         | <i>Q. robur</i>   | 13.636 | 48.196 | 410     | Austria | 1   |
| <b>A398</b> | Aistersheim       | <i>Q. robur</i>   | 13.720 | 48.203 | 440     | Austria | 1   |
| <b>A399</b> | Aistersheim       | <i>Q. robur</i>   | 13.720 | 48.203 | 440     | Austria | 1   |
| <b>A405</b> | Unterscharten     | <i>Q. robur</i>   | 14.017 | 48.162 | 400     | Austria | 2   |
| <b>A428</b> | Dunkelsteinerwald | <i>Q. robur</i>   | 15.376 | 48.226 | 400     | Austria | 2   |
| <b>A434</b> | Wachberg          | <i>Q. robur</i>   | 15.354 | 48.202 | 280     | Austria | 2   |
| <b>A435</b> | Gmünd             | <i>Q. robur</i>   | 15.002 | 48.754 | 520     | Austria | 17a |
| <b>A437</b> | Gmünd             | <i>Q. robur</i>   | 15.002 | 48.754 | 490     | Austria | 17a |
| <b>A459</b> | Oberndorf         | <i>Q. robur</i>   | 12.417 | 47.519 | 740     | Austria | 7   |
| <b>A520</b> | Litschau          | <i>Q. robur</i>   | 15.026 | 48.931 | -       | Austria | 1   |

**Table S3.** Genotypes of haplotypes revealed by PCR-RFLP analysis Petit et al. (2002) in the present analysis with 10 cpSSR markers.

| Haplotype    | μdt1 | μdt4 | μkk4 | ccmp6 | μcd4 | μdt3 | ccmp10 | ccmp2 | μkk3 | μcd5 |
|--------------|------|------|------|-------|------|------|--------|-------|------|------|
| <b>1</b>     | 79   | 145  | 111  | 102   | 101  | 127  | 117    | 165   | 97   | 74   |
| <b>2</b>     | 79   | 145  | 111  | 102   | 99   | 127  | 116    | 165   | 97   | 74   |
| <b>5-6-7</b> | 79   | 144  | 110  | 102   | 100  | 128  | 117    | 164   | 97   | 74   |
| <b>17a</b>   | 80   | 164  | 110  | 102   | 102  | 127  | 116    | 164   | 97   | 75   |





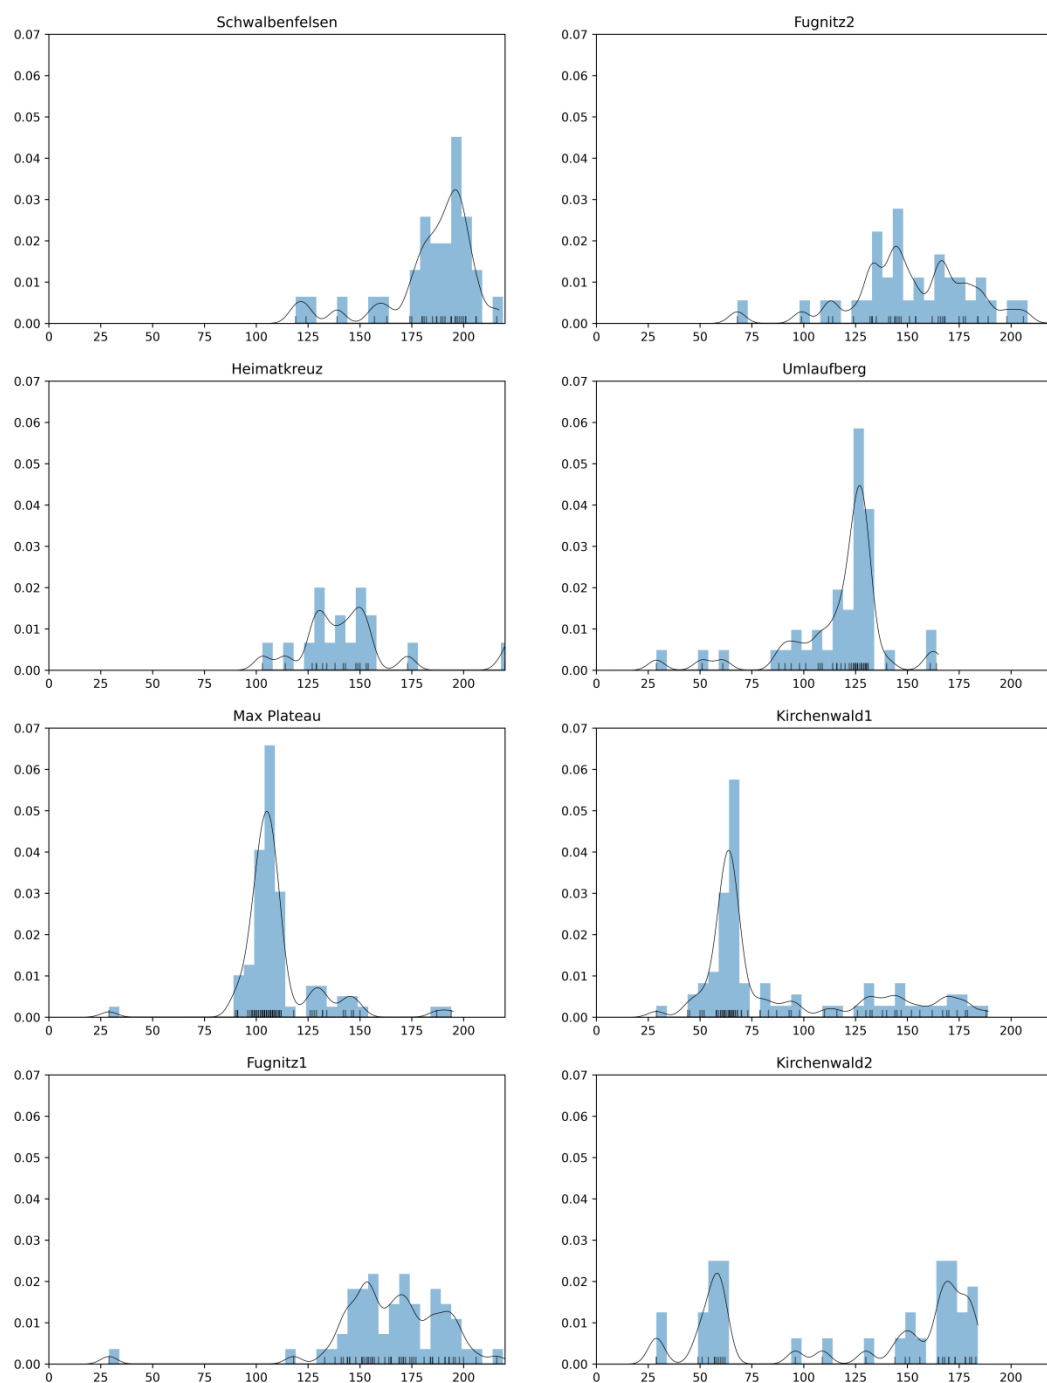

**Figure S3.** Histograms of tree ages (year 2023) for each location under study with age at the x-axis and frequency at the y-axis.

**Table S4.** Measures of genetic diversity within populations based on nuclear SSR. N = number of genotyped; Na = mean number of alleles per locus; Ho = observed heterozygosity; Hs = expected heterozygosity; pG = p-value for Gis; Ar = allelic richness (standardized number of alleles after rarefaction; rarefaction size = 30 individuals), centroid coordinates.

| Population      | Abb. | N  | Na          | Ho                | Hs                | Gis                | pG    | Ar                | Latitude<br>Longitude | Age (2023)<br>Age M (2023) |
|-----------------|------|----|-------------|-------------------|-------------------|--------------------|-------|-------------------|-----------------------|----------------------------|
| Schwalbenfelsen | SF   | 32 | 16.5(± 1.2) | 0.769<br>(±0.069) | 0.89<br>(±0.019)  | 0.135<br>(±0.078)  | 0.001 | 12.43<br>(± 0.77) | 48,8661<br>15,8400    | 119-216<br>183,9           |
| Heimatkreuz     | HK   | 38 | 17.8(± 1.7) | 0.785<br>(±0.081) | 0.89<br>(±0.022)  | 0.118<br>(±0.083)  | 0.001 | 12.73<br>(± 1.11) | 48,8722<br>15,8404    | 103-245<br>182,7           |
| Maxplateau      | MP   | 83 | 20.4(± 2.0) | 0.763<br>(±0.092) | 0.868<br>(±0.034) | 0.121<br>(±0.086)  | 0.001 | 12.10<br>(± 0.89) | 48,8552<br>15,8505    | 90-194<br>111,2            |
| Fugnitz1        | FG1  | 60 | 19.3(± 2.5) | 0.804<br>(±0.082) | 0.884<br>(±0.023) | 0.09<br>(±0.074)   | 0.001 | 12.24<br>(± 1.25) | 48,8438<br>15,8432    | 110-229<br>168,6           |
| Fugnitz2        | FG2  | 37 | 13.6(± 1.5) | 0.740(±0.0<br>80) | 0.875<br>(±0.016) | 0.154<br>(±0.092)  | 0.001 | 10.70<br>(± 0.83) | 48,8490<br>15,8509    | 60-237<br>155,6            |
| Umlaufberg      | UB   | 44 | 16.3(± 1.7) | 0.802<br>(±0.052) | 0.874<br>(±0.026) | 0.083<br>(±0.058)  | 0.001 | 11.66<br>(± 1.15) | 48,8444<br>15,8933    | 51-164<br>118,9            |
| Kirchenwald1    | KW1  | 76 | 15.8(± 1.8) | 0.762<br>(±0.090) | 0.759<br>(±0.059) | -0.004<br>(±0.125) | 0.498 | 9.011<br>(± 1.12) | 48,8212<br>15,9428    | 44-188<br>90,3             |
| Kirchenwald2    | KW2  | 32 | 14.3(± 1.4) | 0.761<br>(±0.092) | 0.824<br>(±0.037) | 0.077<br>(±0.098)  | 0.002 | 10.60<br>(± 0.99) | 48,8213<br>15,9466    | 49-183<br>125,1            |

**Table S5.** Results of pairwise values of  $D_{\text{JOST}}$  (2008) calculated in R package *diveRcity* (Keenan et al. 2013) with associated confidence interval in [].

| $D_{\text{JOST}}$ diversity |                                |                                |                                |                                |                               |                                |                                |
|-----------------------------|--------------------------------|--------------------------------|--------------------------------|--------------------------------|-------------------------------|--------------------------------|--------------------------------|
| Population                  | Schwalbenfelsen                | Heimatkreuz                    | Max Plateau                    | Fugnitz1                       | Fugnitz2                      | Umlaufberg                     | Kirchenwald1                   |
| <b>Schwalbenfelsen</b>      | 0,0041<br>[-0,0517;<br>0,0728] |                                |                                |                                |                               |                                |                                |
| <b>Heimatkreuz</b>          |                                | 0,0034<br>[-0,0058;<br>0,1269] |                                |                                |                               |                                |                                |
| <b>Maxplateau</b>           |                                |                                | 0,0018<br>[-0,0456;<br>0,0605] |                                |                               |                                |                                |
| <b>Fugnitz1</b>             |                                |                                |                                | 0,0351<br>[-0,0026;<br>0,0839] |                               |                                |                                |
| <b>Fugnitz2</b>             |                                |                                |                                |                                | 0,0772<br>[0,0412;<br>0,2256] |                                |                                |
| <b>Umlaufberg</b>           |                                |                                |                                |                                |                               | 0,0586<br>[-0,0036;<br>0,1343] |                                |
| <b>Kirchenwald1</b>         |                                |                                |                                |                                |                               |                                | 0,0685<br>[0,0415;<br>0,1621]  |
| <b>Kirchenwald2</b>         |                                |                                |                                |                                |                               |                                |                                |
|                             | 0,1028<br>[0,0286;<br>0,1899]  | 0,1123<br>[0,0454;<br>0,1904]  | 0,1418<br>[0,0716;<br>0,2204]  | 0,1267<br>[0,0619;<br>0,2112]  | 0,1542<br>[0,0619;<br>0,2668] | 0,092<br>[0,027;<br>0,1696]    | 0,0254<br>[-0,0122;<br>0,0816] |

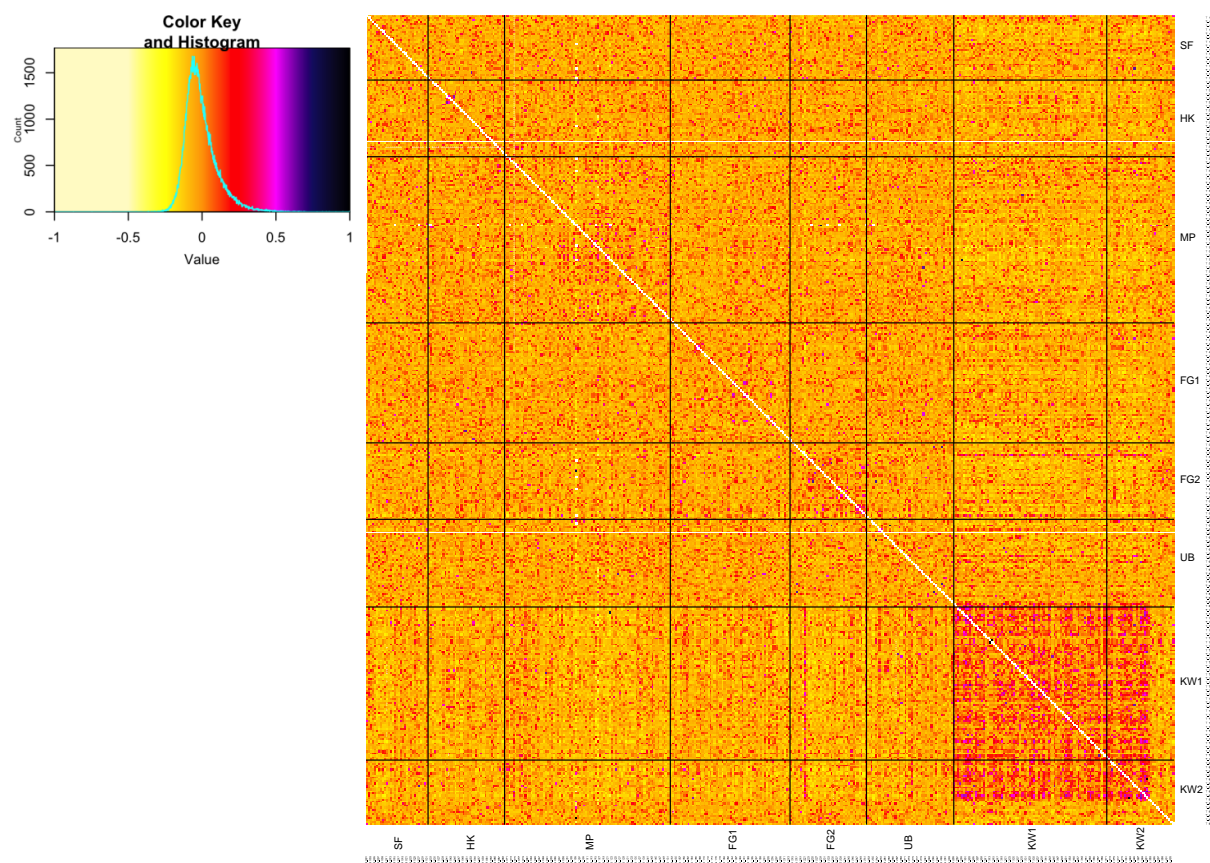

**Figure S4.** Heatmap plot of genetic relatedness matrix calculated in PolyRelatedness.

#### S4 — Analyses and selection of drought-resistant phenotypes

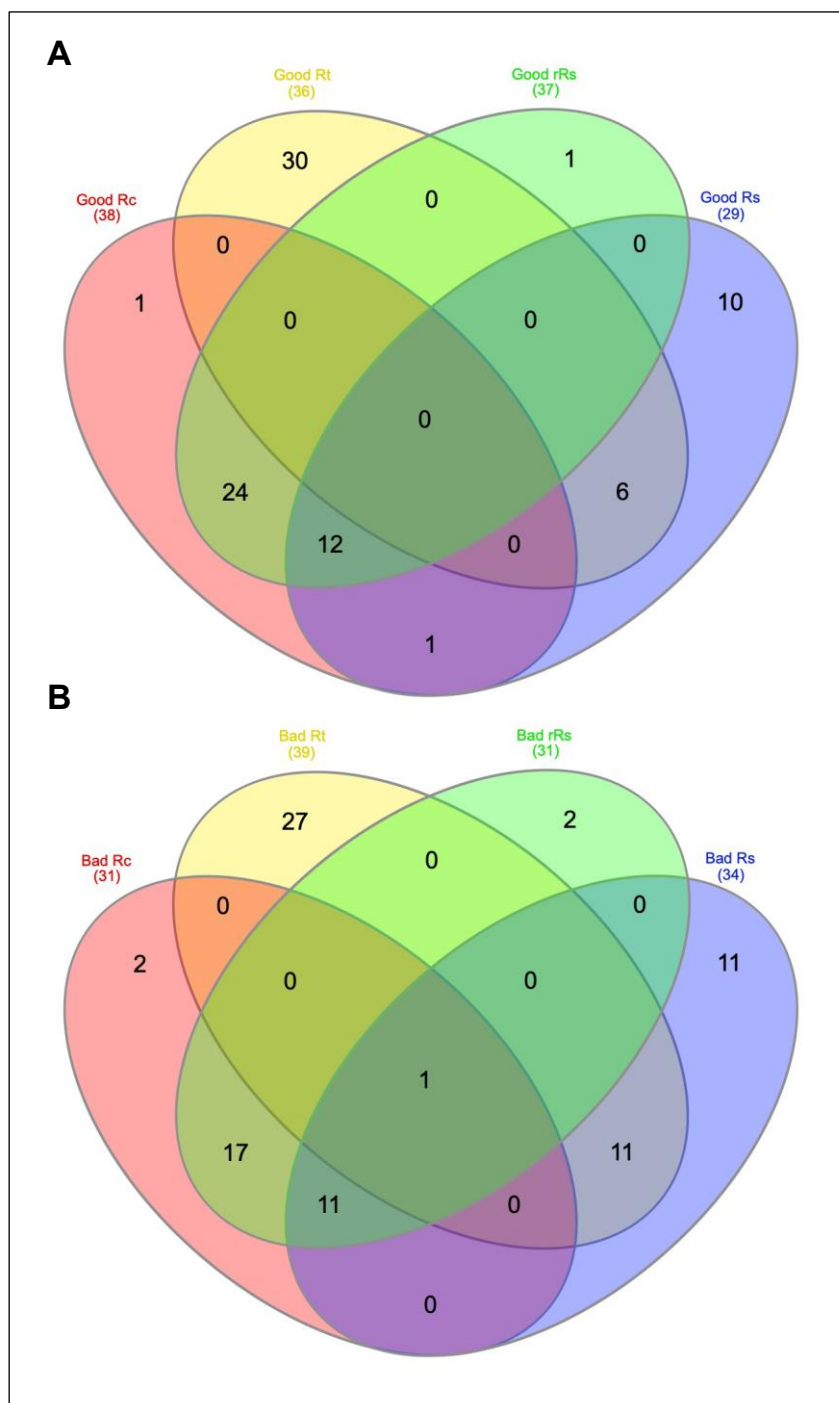

**Figure S5.** Venn diagrams for selected genotypes in both A) “good” and B) “bad” performance on the traits under study.

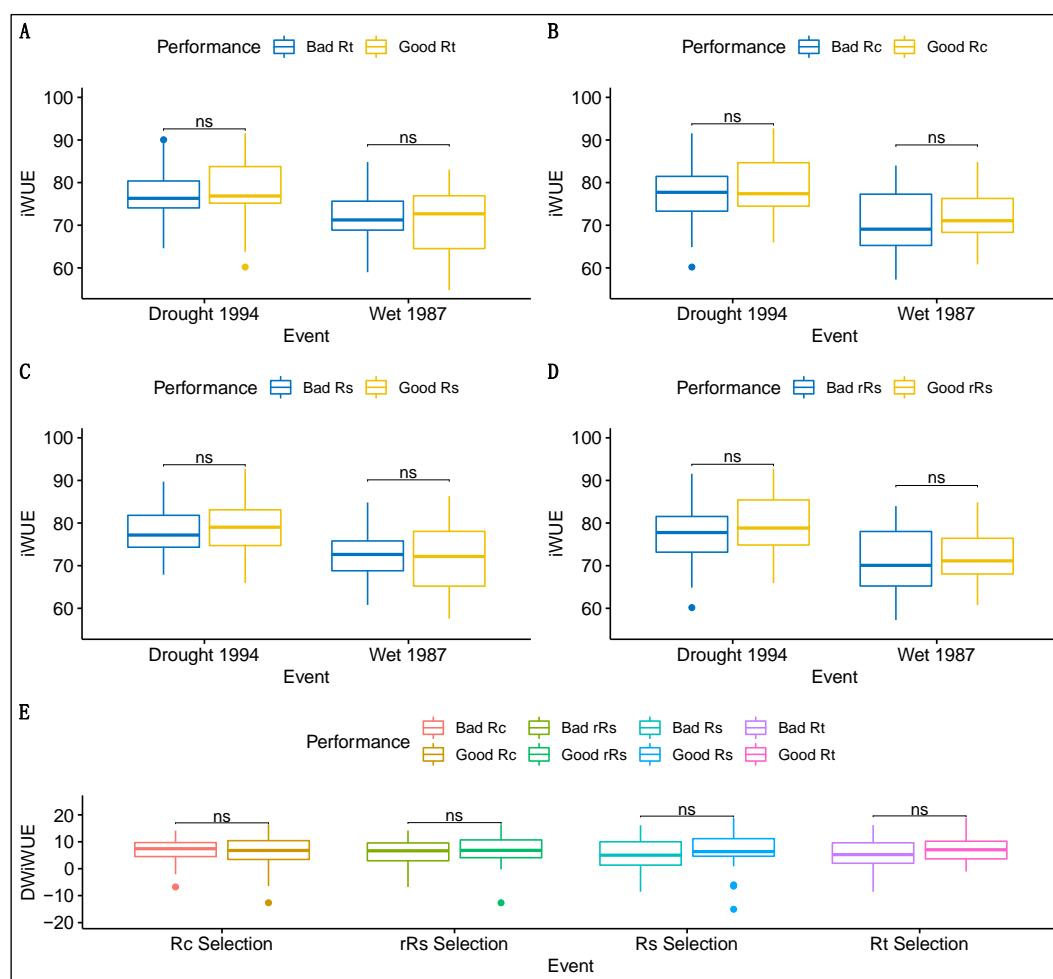

**Figure S6.** Box plots of intrinsic water use efficiency (iWUE) for selected groups (good and bad) for each trait, when isotopic analysis of  $\delta^{13}\text{C}$  of latewood was performed: wet (1987) and dry (1994) years. A) Resistance. B) Recovery. C) Resilience. D) Relative resilience. E) Difference between dry and wet values (DWiWUE) box plots for all traits and groups. All pairwise t-test comparisons showed no significant differences ( $p\text{-value} > 0.05$  - ns).

**Table S6.** Significant repeatability estimates ( $p\text{-value} \leq 0.05$ ) for each studied trait including the standard error and 95% confidence interval.

| Song characteristic                           | R estimate | standard error (SE) | 95% Confidence interval | P value |
|-----------------------------------------------|------------|---------------------|-------------------------|---------|
| <b>Resistance (<math>R_t</math>)</b>          | 0.082      | 0.038               | 0.003, 0.154            | 0.0145  |
| <b>Recovery (<math>R_c</math>)</b>            | 0.088      | 0.035               | 0.019, 0.159            | 0.0059  |
| <b>Relative Resilience (<math>rRs</math>)</b> | 0.065      | 0.035               | 0.000, 0.133            | 0.0324  |

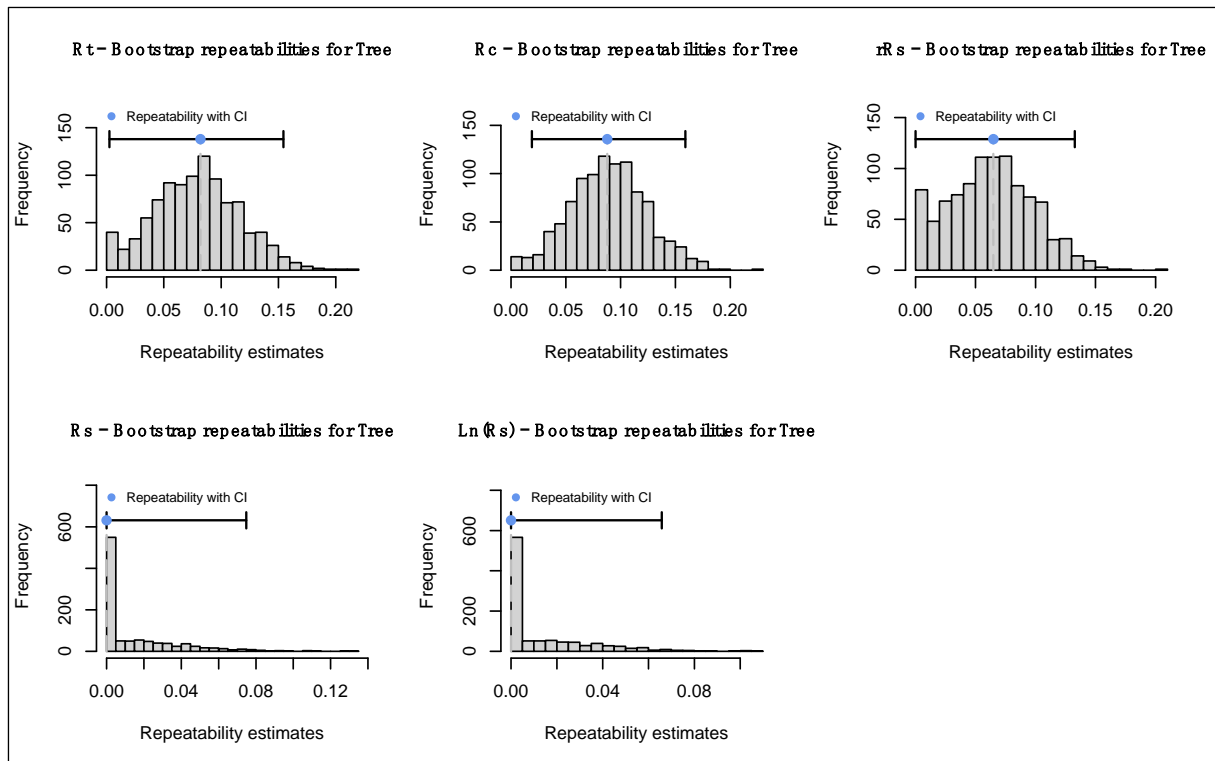

**Figure S7.** Repeatability estimates for each trait ( $R_t$ ,  $R_c$ ,  $Rs$ ,  $\ln(Rs)$ ,  $rRs$ ). Distribution of the parametric bootstrap samples along with the point estimate and the limits of the confidence interval.

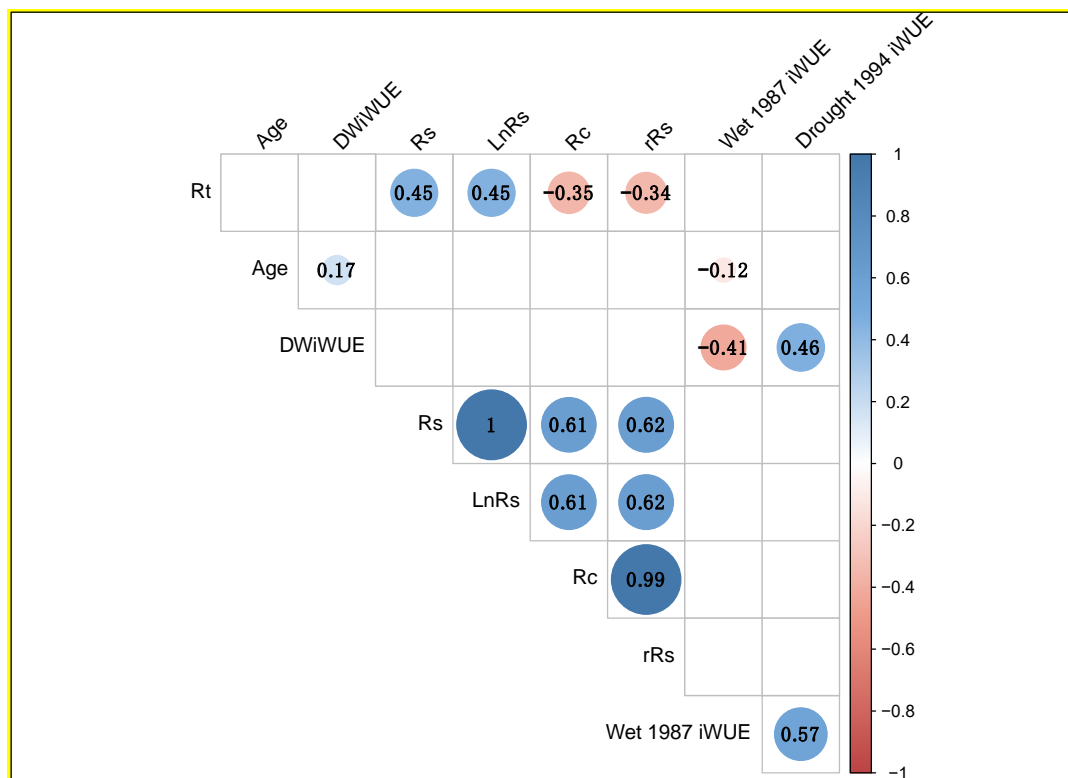

**Figure S8.** Correlogram based on the correlation matrix (Spearman) of all studied traits through all studied drought events (1917, 1947, 1992–1994) and corresponding age. The correlation matrix was ordered according to the degree of association between variables (hierarchical clustering) and the significance threshold was set at  $p\text{-value} \leq 0.01$ . Only significant correlation coefficients are plotted, sized and colored according to their value.



## References

- Beguería, S.; Vicente-Serrano, S. M.; Reig, F. and Latorre, B. Standardized precipitation evapotranspiration index (SPEI) revisited: parameter fitting, evapotranspiration models, tools, datasets and drought monitoring. *Int. J. Climatol* **2014**, 34, 3001–23. <https://doi.org/10.1002/joc.3887>
- Deguilloux, M.-F.; Dumolin-Lapègue, S.; Gielly, L.; Grivet, D.; Petit, R.J. A Set of Primers for the Amplification of Chloroplast Microsatellites in *Quercus*: PRIMER NOTE. *Mol. Ecol. Notes* **2003**, 3, 24–27. <https://doi.org/10.1046/j.1471-8286.2003.00339.x>.
- Weising, K.; Gardner, R.C. A Set of Conserved PCR Primers for the Analysis of Simple Sequence Repeat Polymorphisms in Chloroplast Genomes of Dicotyledonous Angiosperms. *Genome* **1999**, 42, 9–19.
- Vicente-Serrano, S.M.; Beguería, S.; López-Moreno, J.I. A Multiscalar Drought Index Sensitive to Global Warming: The Standardized Precipitation Evapotranspiration Index. *J. Clim.* **2010**, 23, 1696–1718. <https://doi.org/10.1175/2009JCLI2909.1>.
- Steinkellner, H.; Fluch, S.; Turetschek, E.; Lexer, C.; Streiff, R.; Kremer, A.; Burg, K.; Glossl, J. Identification and Characterization of (GA/CT)<sub>n</sub> Microsatellite Loci from *Quercus Petraea*. *Plant Mol. Biol.* **1997**, 33, 1093–1096.
- Kampfer, S.; Lexer, C.; Glössl, J.; Steinkellner, H. Characterization of (GA)<sub>n</sub> Microsatellite Loci from *Quercus Robur*. *Hereditas* **1998**, 129, 183–186. <https://doi.org/10.1111/j.1601-5223.1998.00183.x>.
